# Supplementary material
Source: Springer Nature journal article supplement (https://www.springermedizin.de/resource/supplementary/12888_2010_705_MOESM1_ESM.pdf/9478244)
Supplement: MOESM1 [file 9478244]

Randomized patients  
n = 664 (100%)

Failed to or delayed  
taking randomized medication  
n = 16 (2.4%)

Initiated on  
randomized medication  
n = 648 (97.6%)

Patients excluded due  
to missing values  
n = 31 (4.7%)

Analytical dataset  
for the predictive model  
n = 617 (92.9%)

Completers  
n = 304 (46.9%)

Switchers  
n = 191 (29.5%)

Discontinued early  
(without switching)  
n = 153 (23.6%)
